# Supplementary material for: Ultralight Ag-grid current collector enabled by screen printing Ag ink on Cu foil as efficient deposition-inducing layer for dendrite-free lithium metal batteries
Source: Royal Society of Chemistry journal article supplement (doi:10.1039/d4qm00159a), 2024-01-01
Supplement: d4qm00159a1.pdf [file d4qm00159a1.pdf]

## SUPPLEMENTARY MATERIAL

### **Ultralight Ag-grid current collector enabled by screen printing Ag ink on Cu foil as efficient deposition-inducing layer for dendrite-free lithium metal batteries**

Dongdong Li,<sup>a</sup> Yue He,<sup>a</sup> Bin Chen,<sup>a</sup> Jun Xu,<sup>a</sup> Qingyi Liu,<sup>a</sup> Shengchen Yang<sup>b</sup> and Wen-Yong Lai<sup>a\*</sup>

<sup>a</sup>State Key Laboratory of Organic Electronics and Information Displays (SKLOEID), Institute of Advanced Materials (IAM), School of Chemistry and Life Sciences, Nanjing University of Posts and Telecommunications, 9 Wenyuan Road, Nanjing 210023, China.

<sup>b</sup>Department of Materials Chemistry, Huzhou University, 1 Xueshi Road, Huzhou 313000, China.

\*Authors to whom correspondence should be addressed: iamwylai@njupt.edu.cn

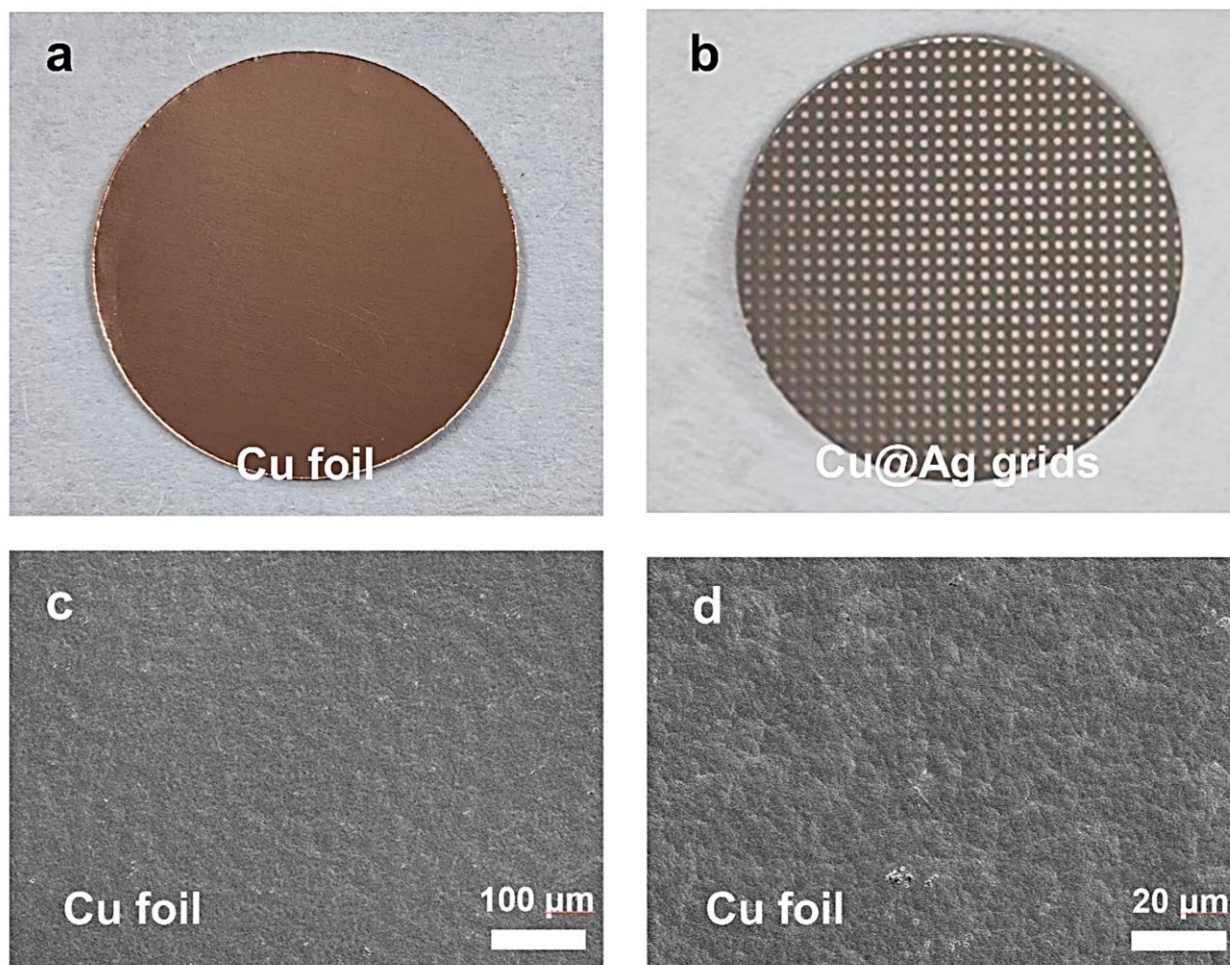

**Fig. S1.** Optical images of the (a) Cu-foil and (b) Cu@Ag-grid CCs. (c, d) SEM images of the Cu-foil CCs.

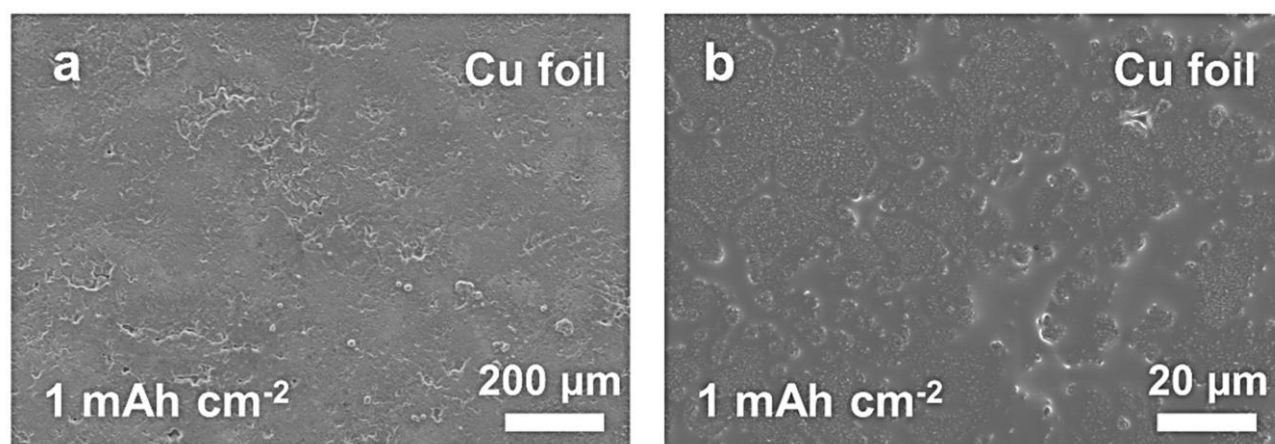

**Fig. S2.** Li plating on a bared Cu foil with the capacity of  $1 \text{ mAh cm}^{-2}$ .
